# Supplementary material for: A multicentre parallel-group randomised trial assessing multiparametric MRI characterisation and image-guided biopsy of prostate in men suspected of having prostate cancer: MULTIPROS study protocol
Source: PubMed Central journal article supplement (PMC6868804; doi:10.1186/s13063-019-3746-0), 2019-11-21
Supplement: 13063_2019_3746_MOESM2_ESM.pdf [file 13063_2019_3746_MOESM2_ESM.pdf]

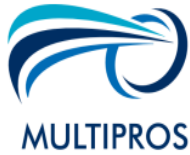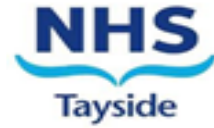

## MULTIPROS study

### INFORMED CONSENT FORM

Subject ID:

|  |  |  |  |  |  |  |
|--|--|--|--|--|--|--|
|  |  |  |  |  |  |  |
|--|--|--|--|--|--|--|

Subject ID- please use T for Tayside cohort and consecutive numbers 0001- 0600 followed by participant's initials

**Title of Project:** Multiparametric MRI characterisation and guided biopsy of the prostate in men suspected of having prostate cancer

**Name of the Chief Investigator:** Professor Ghulam Nabi

INITIALS

|                                                                                                                                                                                                                            | YES                      | NO                       | INITIALS |
|----------------------------------------------------------------------------------------------------------------------------------------------------------------------------------------------------------------------------|--------------------------|--------------------------|----------|
| 1. I confirm that I have read and understood the Patient Information Sheet, V8.0 240119 for the above study. I have had the opportunity to consider the information, ask questions and have these answered satisfactorily. | <input type="checkbox"/> | <input type="checkbox"/> |          |
| 2. I agree to have MRI with contrast.                                                                                                                                                                                      | <input type="checkbox"/> | <input type="checkbox"/> |          |
| 3. I agree, if required, to have an x-ray of my eyes prior to MRI scan for MRI safety reasons.                                                                                                                             | <input type="checkbox"/> | <input type="checkbox"/> |          |
| 4. I understand that by undergoing an eye x-ray, the results may exclude me from having an MRI for safety reasons.                                                                                                         | <input type="checkbox"/> | <input type="checkbox"/> |          |
| 5. I agree, if required, to be assessed for general and/or epidural anaesthesia.                                                                                                                                           | <input type="checkbox"/> | <input type="checkbox"/> |          |
| 6. I understand that after my assessment, general or epidural anaesthesia may not be suitable for me and that I may be excluded from taking part in the study.                                                             | <input type="checkbox"/> | <input type="checkbox"/> |          |
| 7. I agree that my GP be informed of MRI safety status and of my participation in this study.                                                                                                                              | <input type="checkbox"/> | <input type="checkbox"/> |          |
| 8. I understand that my participation is voluntary and that I am free to withdraw at any time without giving any reason, without any medical care or legal rights being affected.                                          | <input type="checkbox"/> | <input type="checkbox"/> |          |
| 9. I understand that my identifiable MRI images of my prostate gland will be stored within the NHS clinical system and will be available to specialist doctors looking after me in the future.                             | <input type="checkbox"/> | <input type="checkbox"/> |          |

|                                                                                                                                                                                                                                                                                                                                                   |                                 |                                |  |
|---------------------------------------------------------------------------------------------------------------------------------------------------------------------------------------------------------------------------------------------------------------------------------------------------------------------------------------------------|---------------------------------|--------------------------------|--|
| 10. I agree to be informed of any incidental finding found during my MRI scan and agree that members of the research team can contact both me and my GP and inform any referral specialist required to carry out further investigations.                                                                                                          | YES<br><input type="checkbox"/> | NO<br><input type="checkbox"/> |  |
| 11. I understand that I may have additional samples taken during my biopsy procedure, and that the additional biopsies will be guided by MRI images from my MRI study.                                                                                                                                                                            | YES<br><input type="checkbox"/> | NO<br><input type="checkbox"/> |  |
| 12. I understand that if my biopsy result shows I have cancer and I choose the option to have surgery to remove my prostate gland (prostatectomy) my prostate gland may be examined by the research team and the results will be compared with the MRI images.                                                                                    | YES<br><input type="checkbox"/> | NO<br><input type="checkbox"/> |  |
| 13. I understand that if I want to withdraw from the study, all identifiable data, not including my MRI scans, or tissue collected, would be withdrawn from the study. Data or tissue which is not identifiable to the research team may be retained.                                                                                             | YES<br><input type="checkbox"/> | NO<br><input type="checkbox"/> |  |
| 14. I understand that relevant sections of my medical notes and data collected during the study may be looked at by research team, sponsors or regulatory authorities where it is relevant to my taking part in this research. I give permission for the research team, sponsors or regulatory authorities to have access to my records and data. | YES<br><input type="checkbox"/> | NO<br><input type="checkbox"/> |  |
| 15. I understand that personal data about me and research data collected during the study will be stored by the University of Dundee and that I have the right to request that the personal and/or research data is deleted.                                                                                                                      | YES<br><input type="checkbox"/> | NO<br><input type="checkbox"/> |  |
| 16. I understand that my research data collected by the research team in this study may be used to support other research in the future, and may be shared anonymously with other researchers or collaborators.                                                                                                                                   | YES<br><input type="checkbox"/> | NO<br><input type="checkbox"/> |  |
| 17. I agree to take part in the above study.                                                                                                                                                                                                                                                                                                      | YES<br><input type="checkbox"/> | NO<br><input type="checkbox"/> |  |

---

Name of Participant

---

Date

---

Signature

---

Name of Person taking consent

---

Date

---

Signature

1 copy for participant; 1 copy for medical notes; 1 (original) to be kept in Site Investigator File
